# Supplementary material for: Natural Selection Reduced Diversity on Human Y Chromosomes
Source: PLOS journal article supplement (doi:10.1371/journal.pgen.1004064), 2014-01-09

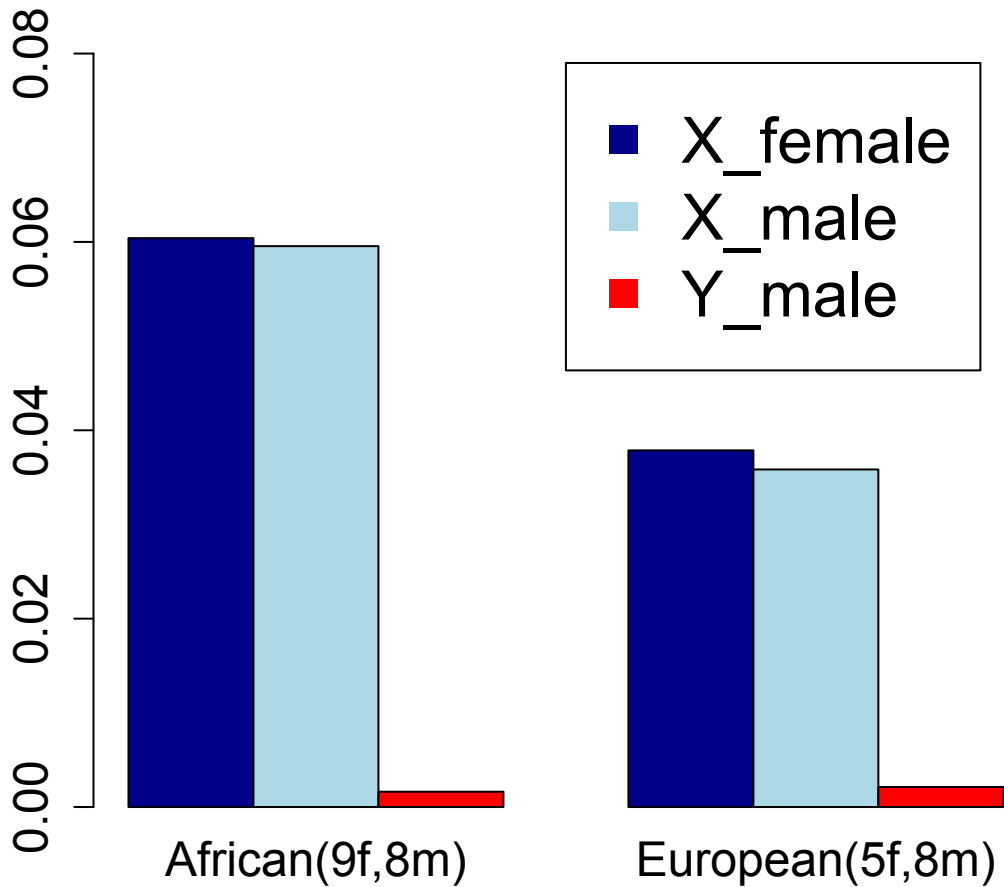

Supplement: S2 (10.1371/journal.pgen.1004064.s002) [file journal.pgen.1004064.s002]
